# Supplementary material
Source: PubMed Central journal article supplement (PMC5679819)
Supplement: supp_the2017-0116_onco12188-sup-0002-suppinfo2.pdf [file supp_the2017-0116_onco12188-sup-0002-suppinfo2.pdf]

Supplemental Tables for:  
 Incorporating tumor characteristics to the AJCC breast cancer staging system  
 Mariana Chavez-MacGregor et al.

**Table S1. Five-year overall survival (OS) among 43,938 breast cancer patients identified in the California Cancer Registry (2005-2008)\*.**

|                   |                  | HR+/HER2- |                    | HER2+/HR+ |                    | HER2+HR- |                    | TNBC |                    |
|-------------------|------------------|-----------|--------------------|-----------|--------------------|----------|--------------------|------|--------------------|
| STAGE             |                  | N         | 5-year OS          | N         | 5-year OS          | N        | 5-year OS          | N    | 5-year OS          |
| <b>Stage I</b>    | T1a N0 M0        | 1802      | 0.97 ( 0.96- 0.97) | 264       | 0.97 ( 0.94- 0.99) | 162      | 0.96 ( 0.91- 0.98) | 148  | 0.93 ( 0.88- 0.96) |
|                   | T1b N0 M0        | 5447      | 0.96 ( 0.95- 0.96) | 612       | 0.95 ( 0.93- 0.97) | 204      | 0.95 ( 0.90- 0.97) | 487  | 0.92 ( 0.89- 0.94) |
|                   | T1c, T1NOS N0 M0 | 9459      | 0.93 ( 0.93- 0.94) | 1492      | 0.94 ( 0.93- 0.95) | 559      | 0.91 ( 0.88- 0.93) | 1392 | 0.89 ( 0.87- 0.90) |
|                   | T1 N1mi M0       | 1044      | 0.97 ( 0.95- 0.97) | 145       | 0.94 ( 0.89- 0.97) | 54       | 0.93 ( 0.81- 0.97) | 88   | 0.78 ( 0.68- 0.86) |
| <b>Stage IIA</b>  | T1 N1 M0         | 2429      | 0.93 ( 0.92- 0.94) | 461       | 0.92 ( 0.90- 0.95) | 191      | 0.89 ( 0.84- 0.93) | 314  | 0.86 ( 0.81- 0.89) |
|                   | T2 N0 M0         | 4165      | 0.89 ( 0.88- 0.89) | 824       | 0.89 ( 0.87- 0.91) | 487      | 0.85 ( 0.82- 0.88) | 1337 | 0.82 ( 0.80- 0.84) |
| <b>Stage IIB</b>  | T2 N1 M0         | 2620      | 0.88 ( 0.87- 0.90) | 600       | 0.90 ( 0.87- 0.92) | 312      | 0.78 ( 0.73- 0.82) | 587  | 0.71 ( 0.67- 0.75) |
|                   | T3 N0 M0         | 309       | 0.86 ( 0.82- 0.89) | 47        | 0.83 ( 0.68- 0.91) | 42       | 0.73 ( 0.57- 0.84) | 91   | 0.72 ( 0.61- 0.80) |
| <b>Stage IIIA</b> | T1 N2 M0         | 463       | 0.91 ( 0.88- 0.93) | 117       | 0.93 ( 0.87- 0.96) | 70       | 0.77 ( 0.65- 0.85) | 69   | 0.75 ( 0.62- 0.83) |
|                   | T2 N2 M0         | 859       | 0.83 ( 0.80- 0.85) | 251       | 0.82 ( 0.76- 0.86) | 128      | 0.72 ( 0.63- 0.79) | 205  | 0.63 ( 0.56- 0.69) |
|                   | T3 N1 M0         | 346       | 0.84 ( 0.80- 0.87) | 69        | 0.93 ( 0.83- 0.97) | 37       | 0.81 ( 0.64- 0.90) | 105  | 0.55 ( 0.45- 0.64) |
|                   | T3 N2 M0         | 236       | 0.81 ( 0.76- 0.86) | 42        | 0.81 ( 0.66- 0.90) | 39       | 0.69 ( 0.51- 0.81) | 43   | 0.42 ( 0.27- 0.56) |
| <b>Stage IIIB</b> | T4 N0 M0         | 61        | 0.57 ( 0.43- 0.68) | 0         |                    | 8        | 0.50 ( 0.15- 0.77) | 23   | 0.57 ( 0.34- 0.74) |
|                   | T4 N1 M0         | 86        | 0.71 ( 0.60- 0.80) | 25        | 0.63 ( 0.41- 0.79) | 17       | 0.70 ( 0.42- 0.86) | 26   | 0.52 ( 0.31- 0.69) |
|                   | T4 N2 M0         | 79        | 0.68 ( 0.57- 0.77) | 31        | 0.57 ( 0.37- 0.72) | 30       | 0.62 ( 0.42- 0.77) | 35   | 0.50 ( 0.32- 0.65) |
| <b>Stage IIIC</b> | Any T N3 M0      | 724       | 0.73 ( 0.70- 0.76) | 215       | 0.75 ( 0.69- 0.80) | 183      | 0.57 ( 0.50- 0.64) | 167  | 0.40 ( 0.32- 0.47) |
| <b>Stage IV</b>   | Any T Any N M1   | 520       | 0.35 ( 0.31- 0.39) | 159       | 0.42 ( 0.34- 0.50) | 126      | 0.20 ( 0.13- 0.27) | 161  | 0.14 ( 0.09- 0.20) |

\*HR: Hormone receptor, HER2: Human Epidermal Growth Factor2, TNBC: Triple Negative Breast Cancer, positive (+), negative (-).

Supplemental Tables for:  
Incorporating tumor characteristics to the AJCC breast cancer staging system  
Mariana Chavez-MacGregor et al.

**Table S2.** Hazard ratios for OS and BCSS according to stage and risk score ordered by increasing HR\*.

| Stage/risk group  | BCSS         |               | OS           |             |
|-------------------|--------------|---------------|--------------|-------------|
|                   | Hazard Ratio | 95% CI        | Hazard Ratio | 95% CI      |
| I risk score 0    | Reference    |               | Reference    |             |
| I risk score 1    | 0.60         | 0.40-0.91     | 0.84         | 0.71-1.01   |
| I risk score 2    | 2.85         | 1.89-4.23     | 1.36         | 1.12-1.65   |
| I risk score 3    | 5.35         | 3.52-8.14     | 2.02         | 1.64-2.50   |
| IIA risk score 0  | 4.00         | 2.47-6.47     | 1.66         | 1.29-2.18   |
| IIA risk score 1  | 2.28         | 1.53-3.39     | 1.33         | 1.11-1.58   |
| IIA risk score 2  | 6.31         | 4.23-9.39     | 2.31         | 1.92-2.79   |
| IIA risk score 3  | 10.67        | 7.14-15.34    | 3.49         | 2.87-4.26   |
| IIB risk score 0  | 5.45         | 3.15-9.75     | 2.15         | 1.50-3.07   |
| IIB risk score 1  | 5.26         | 3.50-7.87     | 2.19         | 1.81-2.65   |
| IIB risk score 2  | 10.44        | 6.96-15.67    | 3.42         | 2.79-4.19   |
| IIB risk score 3  | 21.45        | 14.24-32.32   | 5.98         | 4.81-7.42   |
| IIIA risk score 0 | 11.10        | 6.58-18.72    | 3.74         | 2.65-5.28   |
| IIIA risk score 1 | 8.33         | 5.54-12.21    | 2.95         | 2.41-3.63   |
| IIIA risk score 2 | 17.22        | 11.50-25.77   | 5.13         | 4.18-6.29   |
| IIIA risk score 3 | 37.73        | 24.97-57.00   | 10.78        | 8.65-13.48  |
| IIIB risk score 0 | 13.91        | 5.35-36.18    | 3.92         | 1.92-8.00   |
| IIIB risk score 1 | 10.78        | 6.40-18.17    | 4.00         | 2.98-5.36   |
| IIIB risk score 2 | 27.19        | 16.95-43.60   | 7.52         | 5.65-10.01  |
| IIIB risk score 3 | 35.19        | 21.03-58.87   | 8.15         | 5.69-11.68  |
| IIIC risk score 0 | 14.81        | 7.48-29.30    | 5.67         | 3.42-9.40   |
| IIIC risk score 1 | 21.61        | 14.34-32.57   | 6.01         | 5.33-8.19   |
| IIIC risk score 2 | 33.98        | 22.60-51.09   | 10.07        | 8.13-12.47  |
| IIIC risk score 3 | 67.49        | 43.48-104.75  | 18.79        | 14.43-24.49 |
| IV risk score 0   | 38.10        | 23.25-62.41   | 8.49         | 6.05-11.91  |
| IV risk score 1   | 53.27        | 35.67-79.54   | 12.52        | 10.19-15.38 |
| IV risk score 2   | 80.93        | 53.98-121.33  | 19.03        | 15.37-23.56 |
| IV risk score 3   | 162.38       | 105.64-249.60 | 37.69        | 29.36-48.38 |

\*OS= Overall Survival, BCSS= breast cancer specific survival, CI= confidence interval. Risk score was assigned according to a point system: 1 point if estrogen receptor (ER) negative, 1 point if HER2 negative and 1 point for grade 3. Model adjusted for age, radiation therapy use (yes/no), chemotherapy (yes/no) and surgery (yes/no).
